# Supplementary material for: Screening plant growth-promoting bacteria from the rhizosphere of invasive weed Ageratina adenophora for crop growth
Source: PeerJ. 2023 Mar 10;11:e15064. doi: 10.7717/peerj.15064 (PMC10010174; doi:10.7717/peerj.15064)
Supplement: Supplemental Information 2 — Each data point indicates data of a growth-related parameter of a plant collected at day 60. [file peerj-11-15064-s002.xlsx]

## Sheet: Sheet1
Growth related data (60 day)
Soybean
	Aboveground height (cm)				Aboveground dry weight (g/plant)				Belowground height (cm)				Belowground dry weight (g/plant)
No	Control	Treat with strain KM_A57 with the greastest ACC deaminase production	Treat with strain KM_C04 with the greatest IAA production	Treat with strain KM_A34 with the greatest N-fixation	Control	Treat with strain KM_A57 with the greastest ACC deaminase production	Treat with strain KM_C04 with the greatest IAA production	Treat with strain KM_A34 with the greatest N-fixation	Control	Treat with strain KM_A57 with the greastest ACC deaminase production	Treat with strain KM_C04 with the greatest IAA production	Treat with strain KM_A34 with the greatest N-fixation	Control	Treat with strain KM_A57 with greastest ACC deaminase production	Treat with strain KM_C04 with the greatest IAA production	Treat with strain KM_A34 with the greatest N-fixation
1	27.8	26.02	29.33	26.8	1.84	1.77	2.28	1.79	16.37	17.09	14.96	15.39	0.33	0.33	0.31	0.36
2	29.12	29.31	34.81	32.17	1.95	2.1	2.21	2.1	16.03	16.93	16.63	19.03	0.45	0.41	0.45	0.44
3	26.3	26.56	28.64	30.25	2.12	2.27	2.23	2.08	16.99	16.84	18.57	16.05	0.48	0.41	0.49	0.5
4	28.32	26.53	32.91	26.34	2.08	2.03	2.25	2.03	17.26	19.12	14.83	20.34	0.37	0.4	0.34	0.37
5	29.17	28.35	35.87	32.22	2.07	1.92	2.24	2.02	16.54	18.37	18.13	17.57	0.31	0.29	0.3	0.34
6	26.89	26.14	27.3	25.86	2.18	2.44	2.27	2.34	16.88	16.72	14.46	17.94	0.37	0.36	0.36	0.36
7	26.45	24.71	27.8	27.4	1.82	1.77	2.26	1.77	17.94	17.84	15.49	20.06	0.42	0.39	0.39	0.45
8	27.64	27.87	33.15	28.64	1.88	2.02	2.22	2.03	18.01	19.91	19.56	18.14	0.46	0.45	0.46	0.45
9	28.31	28.52	32.9	26.33	1.94	1.79	2.22	1.79	16.77	17.61	16.35	16.82	0.38	0.33	0.35	0.37
10	29.03	27.22	31.71	33.08	1.88	2.13	2.33	2.13	17.64	18.52	17.2	19.74	0.39	0.4	0.4	0.42
11	26.23	26.5	27.56	26.17	1.96	1.91	2.22	2.21	18.15	20.06	19.7	20.28	0.42	0.38	0.42	0.44
12	28.57	26.77	34.19	30.6	2.17	2.32	2.31	2.23	17.65	17.5	15.21	17.75	0.49	0.49	0.48	0.49
Faba bean
	Aboveground height (cm)				Aboveground dry weight (g/plant)				Belowground height (cm)				Belowground dry weight (g/plant)
No	Control	Treat with strain KM_A57 with the greastest ACC deaminase production	Treat with strain KM_C04 with the greatest IAA production	Treat with strain KM_A34 with the greatest N-fixation	Control	Treat with strain KM_A57 with the greastest ACC deaminase production	Treat with strain KM_C04 with the greatest IAA production	Treat with strain KM_A34 with the greatest N-fixation	Control	Treat with strain KM_A57 with the greastest ACC deaminase production	Treat with strain KM_C04 with the greatest IAA production	Treat with strain KM_A34 with the greatest N-fixation	Control	Treat with strain KM_A57 with greastest ACC deaminase production	Treat with strain KM_C04 with the greatest IAA production	Treat with strain KM_A34 with the greatest N-fixation
1	35.2	30.04	33.92	30.26	3.23	3.18	3.1	3.05	18.01	18.04	23.17	15.71	1.08	1.06	1.45	0.98
2	37.5	38.19	40.27	38.43	3.46	3.61	3.94	3.89	19.22	17.19	23.65	16.66	1.23	1.16	1.43	1.05
3	38.6	38.23	36.38	33.47	3.58	3.73	3.97	3.92	18.43	18.44	23.68	16.02	1.17	1.02	1.46	1
4	38.9	34.51	42.7	39.75	3.21	3.16	3.08	3.03	17.88	15.92	23.01	16.54	1.19	1.24	1.48	1.06
5	39.1	33.7	39.9	34.94	3.69	3.55	3.88	3.83	19.64	19.58	23.17	16.07	1.25	1.1	1.46	1.1
6	37.8	38.48	38.58	37.71	3.55	3.7	3.74	3.69	18.04	16.07	24.2	15.68	1.15	1.2	1.53	1
7	39.3	36.88	42.11	37.13	3.37	3.42	3.65	3.6	20.25	20.16	23.92	17.42	1.28	1.33	1.6	1.02
8	38.2	35.85	36.98	36.09	2.99	3.04	3.05	3	20.88	18.76	23.7	16.15	1.06	1.02	1.42	1.03
9	37.7	30.38	36.47	33.62	2.88	2.82	3.13	3.09	18.89	18.87	23.25	16.6	1.29	1.14	1.51	1.16
10	36.9	39.63	39.66	36.86	3.41	3.56	3.49	3.44	17.23	15.3	22.21	16.98	1.18	1.03	1.49	1.01
11	35.4	30.22	35.13	32.45	3.63	3.59	3.92	3.57	19.54	19.49	23.05	16.34	1.15	1.2	1.43	1.01
12	38.5	39.13	40.29	37.38	2.76	3	2.9	3.17	19.95	17.88	23.55	17.99	1.22	1.17	1.5	1.06
Pea
	Aboveground height (cm)				Aboveground dry weight (g/plant)				Belowground height (cm)				Belowground dry weight (g/plant)
No	Control	Treat with strain KM_A57 with the greastest ACC deaminase production	Treat with strain KM_C04 with the greatest IAA production	Treat with strain KM_A34 with the greatest N-fixation	Control	Treat with strain KM_A57 with the greastest ACC deaminase production	Treat with strain KM_C04 with the greatest IAA production	Treat with strain KM_A34 with the greatest N-fixation	Control	Treat with strain KM_A57 with the greastest ACC deaminase production	Treat with strain KM_C04 with the greatest IAA production	Treat with strain KM_A34 with the greatest N-fixation	Control	Treat with strain KM_A57 with greastest ACC deaminase production	Treat with strain KM_C04 with the greatest IAA production	Treat with strain KM_A34 with the greatest N-fixation
1	30.11	38.8	37	34.75	1.72	2.26	2.3	2.19	12.33	12.18	12.48	10.01	0.33	0.45	0.39	0.41															0.3854			0.405
2	34.56	38.18	38.44	37.74	2.01	2.21	2.47	2.43	15.48	17.55	13.41	14.83	0.48	0.48	0.49	0.49															0.487			0.4909
3	33.23	37.22	39.58	35.25	1.88	2.25	2.44	2.37	13.77	13.72	10.82	10.3	0.32	0.41	0.37	0.38															0.3646			0.3839
4	32.18	37.01	38.84	37.07	1.83	2.19	2.31	2.23	14.05	17.02	15.08	14.55	0.39	0.49	0.4	0.4															0.4			0.4013
5	34.69	37.89	41.45	39.89	1.98	2.07	2.5	2.31	12.75	12.63	10.87	12.39	0.42	0.46	0.43	0.46															0.4323			0.4545
6	33.74	38.8	40.59	36.82	1.95	2.64	2.52	2.55	14.91	16.94	14.88	12.32	0.43	0.46	0.44	0.49															0.4431			0.4856
7	32.22	38.05	39.63	38.12	1.75	2.06	2.34	2.07	13.88	13.84	11.92	10.4	0.35	0.46	0.39	0.41															0.387			0.4071
8	34.58	38.77	40.46	36.76	1.89	2.3	2.32	2.44	14.25	16.23	14.27	14.73	0.38	0.5	0.4	0.4															0.3993			0.4003
9	33.71	38.77	40.99	36.79	1.84	2.29	2.24	2.18	13.87	14.83	11.91	11.39	0.44	0.47	0.45	0.46															0.4539			0.4566
10	35.02	38.27	41.42	39.26	1.83	2	2.45	2.37	14.76	16.78	14.74	14.18	0.39	0.47	0.47	0.46															0.4692			0.4613
11	31.98	38.78	40.12	36.85	1.77	2.13	2.16	2.09	15.01	14.05	12.98	11.41	0.41	0.48	0.42	0.44															0.4216			0.4435
12	32.73	38.03	39.6	37.69	1.86	2.32	2.48	2.41	14.57	15.57	14.57	15.01	0.42	0.48	0.48	0.48															0.4823			0.4745
Wheat
	Aboveground height (cm)				Aboveground dry weight (g/plant)				Belowground height (cm)				Belowground dry weight (g/plant)
No	Control	Treat with strain KM_A57 with the greastest ACC deaminase production	Treat with strain KM_C04 with the greatest IAA production	Treat with strain KM_A34 with the greatest N-fixation	Control	Treat with strain KM_A57 with the greastest ACC deaminase production	Treat with strain KM_C04 with the greatest IAA production	Treat with strain KM_A34 with the greatest N-fixation	Control	Treat with strain KM_A57 with the greastest ACC deaminase production	Treat with strain KM_C04 with the greatest IAA production	Treat with strain KM_A34 with the greatest N-fixation	Control	Treat with strain KM_A57 with greastest ACC deaminase production	Treat with strain KM_C04 with the greatest IAA production	Treat with strain KM_A34 with the greatest N-fixation
1	20.12	20.64	25.65	18.88	0.98	1.14	1.21	1.15	50.2	61.32	60.53	52.1	0.22	0.21	0.13	0.22									0.22			0.2085			0.13387			0.2241
2	21.34	23.95	24.5	22.09	1.46	1.45	1.36	1.47	50.45	63.63	64.84	58.37	0.24	0.29	0.36	0.28									0.24			0.2902			0.3604			0.283
3	20.88	20.45	23.02	18.63	0.94	1	1.2	1.01	49.94	64	61.21	55.81	0.19	0.3	0.3	0.22									0.19			0.2951			0.2953			0.2182
4	23.01	26.75	24.9	24.74	0.99	1.05	1.12	1.06	55.82	67.3	70.53	60.27	0.18	0.11	0.11	0.19									0.18			0.106			0.1062			0.1873
5	25.75	28.69	26.98	24.45	1.21	1.09	1.27	1.1	54.01	65.05	65.28	60.28	0.23	0.21	0.15	0.28									0.23			0.2093			0.1496			0.2821
6	21.56	22.19	26.27	22.31	1.27	1.55	1.54	1.56	48.87	62.67	62.87	52.64	0.24	0.3	0.36	0.23									0.24			0.3002			0.3604			0.233
7	22.23	24.91	25.54	23.97	1.18	1.36	1.44	1.37	54.23	65.32	66.55	60.52	0.31	0.24	0.4	0.32									0.31			0.236			0.3953			0.3198
8	20.91	21.49	23.02	18.66	1.07	1.04	1.12	1.05	49.76	63.77	62.98	53.62	0.18	0.3	0.14	0.21									0.18			0.2951			0.1364			0.2073
9	22.82	23.54	26.69	21.55	0.89	0.95	1.11	0.96	48.88	63.68	65.89	52.65	0.21	0.33	0.13	0.25									0.21			0.3276			0.1279			0.2502
10	27.74	30.83	30.22	28.41	1.35	1.34	1.43	1.35	56.21	66.78	65.02	62.69	0.19	0.11	0.31	0.27									0.19			0.106			0.3062			0.2682
11	26.86	27.89	30.23	24.54	1.41	1.6	1.5	1.71	51.02	64.34	64.55	55	0.27	0.26	0.39	0.28									0.27			0.2577			0.393			0.2759
12	28.56	31.71	30.15	30.22	1.09	1.16	1.41	1.07	55.01	67.29	67.52	61.38	0.33	0.39	0.26	0.31									0.33			0.3927			0.2623			0.3088
Chinese cabbage
	Aboveground height (cm)				Aboveground dry weight (g/plant)				Belowground height (cm)				Belowground dry weight (g/plant)
No	Control	Treat with strain KM_A57 with the greastest ACC deaminase production	Treat with strain KM_C04 with the greatest IAA production	Treat with strain KM_A34 with the greatest N-fixation	Control	Treat with strain KM_A57 with the greastest ACC deaminase production	Treat with strain KM_C04 with the greatest IAA production	Treat with strain KM_A34 with the greatest N-fixation	Control	Treat with strain KM_A57 with the greastest ACC deaminase production	Treat with strain KM_C04 with the greatest IAA production	Treat with strain KM_A34 with the greatest N-fixation	Control	Treat with strain KM_A57 with greastest ACC deaminase production	Treat with strain KM_C04 with the greatest IAA production	Treat with strain KM_A34 with the greatest N-fixation
1	50.23	46.85	65.84	59.48	10.01	8.46	10.91	8.69	14.67	13.23	18.12	13.36	0.88	0.77	0.84	0.81												0.769			0.8435			0.8123
2	52.34	52.91	68.44	59.05	9.57	12	12.38	12.22	15.03	17.61	16.54	19.76	1.03	1.12	1.2	1.17												1.1171			1.2044			1.1678
3	55.68	55.15	64.55	63.34	8.89	7.29	11.57	10.49	15.22	16.81	16.76	14.98	0.92	0.81	0.89	1.46												0.8085			0.8864			1.46
4	54.47	51.98	65.06	63.95	9.34	11.76	10.11	8.97	14.88	14.45	18.36	18.6	1.25	1.33	1.44	1.4												1.3344			1.4403			1.3959
5	58.82	56.21	70.42	65.97	9.78	9.22	12.63	9.44	14.97	14.55	16.47	15.7	0.79	0.68	0.75	1												0.6801			0.747			1
6	51.98	51.56	65.99	62.07	10.21	11.67	11.14	11.9	17.33	19	19.22	21.33	1.26	1.34	1.45	1.41												1.3442			1.451			1.4062
7	53.67	50.2	66.08	62.07	10.45	9.92	11.25	12.16	14.15	13.69	18.51	13.78	0.91	0.7	0.88	1.04												0.6986			0.8757			1.0434
8	57.78	58.2	69.14	64.77	9.88	11.33	12.75	9.55	15.78	17.39	18.26	18.6	0.86	1.05	1.02	0.79												1.0493			1.0221			0.7916
9	59.01	58.39	69.65	66.19	9.15	7.56	9.88	8.77	14.79	14.36	17.41	15.5	0.94	0.83	1.11	0.88												0.8283			1.1079			0.8745
10	54.39	51.9	68.03	62.54	8.64	11.02	11.28	10.23	16.88	18.53	19.69	21.83	1.21	1.3	1.16	0.45												1.2949			1.16			0.4544
11	53.25	49.79	66.1	61.85	9.16	8.57	10.35	8.78	14.15	14.7	18.51	14.78	1.17	1.26	1.16	1.11												1.2554			1.1545			1.1129
12	51.67	52.25	65	63.68	9.54	10.98	12.08	11.19	18.01	18.69	19.01	19.09	1.27	1.15	1.5	1.43												1.1541			1.4988			1.43
Ageratina adenophora
	Aboveground height (cm)				Aboveground dry weight (g/plant)				Belowground height (cm)				Belowground dry weight (g/plant)
No	Control	Treat with strain KM_A57 with the greastest ACC deaminase production	Treat with strain KM_C04 with the greatest IAA production	Treat with strain KM_A34 with the greatest N-fixation	Control	Treat with strain KM_A57 with the greastest ACC deaminase production	Treat with strain KM_C04 with the greatest IAA production	Treat with strain KM_A34 with the greatest N-fixation	Control	Treat with strain KM_A57 with the greastest ACC deaminase production	Treat with strain KM_C04 with the greatest IAA production	Treat with strain KM_A34 with the greatest N-fixation	Control	Treat with strain KM_A57 with greastest ACC deaminase production	Treat with strain KM_C04 with the greatest IAA production	Treat with strain KM_A34 with the greatest N-fixation
1	13.99	17.12	17.31	15.77	0.26	0.36	0.15	0.34	13.34	15.54	18.55	17.2	0.17	0.22	0.17	0.15												0.2198			0.1726			0.1523
2	14.57	17.79	17.99	18.46	0.22	0.36	0.31	0.3	12.53	17.47	15.49	14.22	0.15	0.28	0.17	0.25												0.2826			0.1741			0.2514
3	15.03	18.32	19.53	19.01	0.21	0.34	0.26	0.38	13.68	16.98	17	15.62	0.18	0.2	0.19	0.25												0.2021			0.1939			0.2503
4	18.88	20.76	20.02	21.63	0.38	0.37	0.3	0.47	14.55	20.12	20.14	18.67	0.19	0.26	0.23	0.22												0.2545			0.2253			0.2221
5	19.02	22.92	21.18	23.79	0.42	0.45	0.42	0.5	18.02	24.68	24.71	22.89	0.24	0.22	0.25	0.26												0.2234			0.2519			0.2638
6	16.74	18.29	20.52	19.06	0.33	0.39	0.3	0.47	17.14	21.53	21.55	19.82	0.21	0.25	0.25	0.28												0.2491			0.2479			0.28
7	14.25	17.42	18.62	18.08	0.28	0.36	0.23	0.34	18.26	25	25.02	23.18	0.25	0.29	0.26	0.26												0.2891			0.2633			0.256
8	17.75	19.46	18.7	20.27	0.34	0.39	0.37	0.35	15.63	19.54	19.56	17.98	0.21	0.23	0.26	0.22												0.2285			0.2579			0.217
9	18.03	19.78	21.4	20.61	0.36	0.46	0.21	0.58	18.89	22.83	22.85	23.94	0.22	0.3	0.25	0.25												0.2974			0.2524			0.2517
10	19.21	21.14	22.03	24.02	0.43	0.4	0.55	0.57	12.66	18.64	18.66	14.38	0.16	0.22	0.24	0.26												0.2176			0.2413			0.2558
11	16.66	18.2	18.43	18.96	0.35	0.44	0.44	0.57	17.77	23.32	21.38	22.58	0.22	0.29	0.24	0.27												0.2915			0.2393			0.2693
12	18.02	21.77	20.01	22.59	0.46	0.4	0.34	0.51	15.46	21.35	22.34	17.78	0.2	0.21	0.2	0.27												0.2068			0.2			0.2677
