# Supplementary material for: Screening plant growth-promoting bacteria from the rhizosphere of invasive weed Ageratina adenophora for crop growth
Source: PeerJ journal article supplement (doi:10.7717/peerj.15064), 2023-03-10
Supplement: SupplementaryFile1.pdf [file SupplementaryFile1.pdf]

| No. | Strains | Closely related bacterial species (strain No.)<br>[similarity of 16S rRNA gene sequence] | Plant growth-promoting traits <sup>a</sup> |                                                      |                                                                                |
|-----|---------|------------------------------------------------------------------------------------------|--------------------------------------------|------------------------------------------------------|--------------------------------------------------------------------------------|
|     |         |                                                                                          | IAA production<br>(mg L <sup>-1</sup> )    | ACC deaminase<br>production (U<br>mg <sup>-1</sup> ) | N-fixation<br>(relative <i>nifH</i><br>gene expression<br>level <sup>b</sup> ) |
| 1   | YL_H36  | <i>Acinetobacter dispersus</i> (NR 148844) [0.9979]                                      | 0.35 (±0.05)                               | – <sup>c</sup>                                       | –                                                                              |
| 2   | YL_E97  | <i>Acinetobacter lwoffii</i> (AB859068) [0.9980]                                         | –                                          | –                                                    | 1.0210                                                                         |
| 3   | YL_F31  | <i>Agrobacterium viscosum</i> (AY794055) [0.9986]                                        | 18.63 (±3.12)                              | –                                                    | –                                                                              |
| 4   | KM_A82  | <i>Bacillus simplex</i> (DQ275178) [0.9970]                                              | 10.58 (±2.18)                              | 0.18 (±0.01)                                         | 1.0406                                                                         |
| 5   | KM_E08  | <i>Bacillus subtilis</i> (MK905506) [1]                                                  | –                                          | 0.39 (±0.01)                                         | –                                                                              |
| 6   | KM_C11  | <i>Bacillus subtilis</i> (MK905506) [1]                                                  | –                                          | 0.02 (±0.00)                                         | –                                                                              |
| 7   | YJ_E06  | <i>Burkholderia stabilis</i> (NR 041719) [0.9930]                                        | –                                          | –                                                    | 1.0102                                                                         |
| 8   | KM_A86  | <i>Cedecea davisae</i> (AB682275) [0.9972]                                               | 14.78 (±2.12)                              | 0.21 (±0.01)                                         | –                                                                              |
| 9   | YL_F04  | <i>Cedecea davisae</i> (AB682275) [0.9972]                                               | 12.18 (±1.18)                              | 3.17 (±0.02)                                         | 1.0310                                                                         |
| 10  | YL_F01  | <i>Cedecea davisae</i> (AB682275) [0.9972]                                               | –                                          | 2.91 (±0.01)                                         | 1.0622                                                                         |
| 11  | KM_A71  | <i>Chryseobacterium indologenes</i> (JX515610) [0.9881]                                  | 15.37 (±3.07)                              | –                                                    | –                                                                              |
| 12  | KM_A70  | <i>Chryseobacterium indologenes</i> (JX515610) [0.9881]                                  | 14.68 (±3.45)                              | –                                                    | –                                                                              |
| 13  | KM_A64  | <i>Chryseobacterium indologenes</i> (JX515610) [0.9881]                                  | 12.23 (±2.12)                              | –                                                    | –                                                                              |
| 14  | KM_A63  | <i>Chryseobacterium indologenes</i> (JX515610) [0.9881]                                  | 11.68 (±2.01)                              | –                                                    | –                                                                              |
| 15  | KM_A66  | <i>Chryseobacterium indologenes</i> (JX515610) [0.9881]                                  | 10.5 (±1.18)                               | –                                                    | –                                                                              |
| 16  | KM_A69  | <i>Chryseobacterium indologenes</i> (JX515610) [0.9881]                                  | 10.03 (±1.67)                              | –                                                    | –                                                                              |
| 17  | KM_A62  | <i>Chryseobacterium indologenes</i> (JX515610) [0.9881]                                  | 8.82 (±1.34)                               | –                                                    | –                                                                              |
| 18  | KM_A67  | <i>Chryseobacterium indologenes</i> (JX515610) [0.9881]                                  | 7.58 (±1.02)                               | –                                                    | –                                                                              |
| 19  | KM_C35  | <i>Chryseobacterium nakagawai</i> (NR 126257) [0.9922]                                   | 0.78 (±0.12)                               | –                                                    | –                                                                              |
| 20  | YL_F33  | <i>Chryseobacterium rhizoplanae</i> (LN995706) [0.9901]                                  | 21.67 (±5.56)                              | –                                                    | –                                                                              |
| 21  | KM_C37  | <i>Chryseobacterium rhizoplanae</i> (LN995706) [0.9901]                                  | 1.95 (±0.07)                               | –                                                    | –                                                                              |
| 22  | YL_F21  | <i>Chryseobacterium</i> sp. (KJ130053) [0.9780]                                          | –                                          | 0.09 (±0.01)                                         | 1.0208                                                                         |
| 23  | YL_F22  | <i>Chryseobacterium</i> sp. (KJ130053) [0.9760]                                          | –                                          | 0.03 (±0.01)                                         | –                                                                              |
| 24  | YL_F12  | <i>Chryseobacterium</i> sp. (MG725656) [0.9760]                                          | 11.50 (±1.07)                              | –                                                    | –                                                                              |
| 25  | YJ_E30  | <i>Comamonas odontotermitis</i> (NR 043859) [0.9986]                                     | 11.48 (±2.56)                              | –                                                    | –                                                                              |
| 26  | KM_A72  | <i>Comamonas odontotermitis</i> (NR 043859) [0.9986]                                     | 11.20 (±1.87)                              | –                                                    | –                                                                              |
| 27  | KM_A76  | <i>Comamonas odontotermitis</i> (NR 043859) [0.9986]                                     | 9.28 (±1.07)                               | –                                                    | –                                                                              |
| 28  | KM_C41  | <i>Comamonas odontotermitis</i> (NR 043859) [0.9986]                                     | 0.75 (±0.07)                               | –                                                    | –                                                                              |
| 29  | KM_A40  | <i>Delftia acidovorans</i> (AB020186) [0.9986]                                           | 16.88 (±4.46)                              | –                                                    | –                                                                              |
| 30  | KM_C02  | <i>Delftia acidovorans</i> (AB020186) [0.9986]                                           | 5.17 (±1.51)                               | –                                                    | –                                                                              |
| 31  | YL_F52  | <i>Ensifer adhaerens</i> (KR819181) [1]                                                  | –                                          | 0.41 (±0.02)                                         | 1.0704                                                                         |
| 32  | YL_E50  | <i>Ensifer adhaerens</i> (KU179352) [0.9986]                                             | 17.67 (±3.66)                              | –                                                    | –                                                                              |
| 33  | KM_A35  | <i>Ensifer adhaerens</i> (KU179352) [0.9986]                                             | 0.57 (±0.02)                               | –                                                    | –                                                                              |

|    |        |                                                         |                     |                    |        |
|----|--------|---------------------------------------------------------|---------------------|--------------------|--------|
| 34 | KM_A25 | <i>Ensifer adhaerens</i> (KU179352) [0.9986]            | 0.13 ( $\pm$ 0.01)  | –                  | –      |
| 35 | YL_F03 | <i>Ensifer adhaerens</i> (KY418071) [0.9980]            | –                   | –                  | 1.0304 |
| 36 | YL_F36 | <i>Ensifer adhaerens</i> (KY418071) [0.9980]            | –                   | –                  | 1.0406 |
| 37 | YL_F06 | <i>Ensifer adhaerens</i> (KY418071) [0.9980]            | –                   | –                  | 1.0426 |
| 38 | YL_F38 | <i>Ensifer adhaerens</i> (KY418071) [0.9980]            | –                   | –                  | 1.0301 |
| 39 | YL_F37 | <i>Ensifer adhaerens</i> (KY418071) [0.9980]            | –                   | –                  | 1.0402 |
| 40 | YL_F47 | <i>Ensifer adhaerens</i> (KY418071) [0.9980]            | –                   | –                  | 1.0428 |
| 41 | YL_F44 | <i>Ensifer adhaerens</i> (KY418071) [0.998]             | –                   | –                  | 1.0512 |
| 42 | YL_F46 | <i>Ensifer adhaerens</i> (KY418071) [0.998]             | –                   | –                  | 1.0398 |
| 43 | KM_C04 | <i>Enterobacter asburiae</i> (KC568144) [0.9966]        | 35.02 ( $\pm$ 8.18) | 1.90 ( $\pm$ 0.02) | 1.0422 |
| 44 | YJ_E03 | <i>Enterobacter asburiae</i> (KC568144) [0.9966]        | 21.98 ( $\pm$ 4.73) | 0.03 ( $\pm$ 0.01) | –      |
| 45 | YJ_E24 | <i>Enterobacter asburiae</i> (KC568144) [0.9966]        | 2.82 ( $\pm$ 0.41)  | –                  | –      |
| 46 | KM_C07 | <i>Enterobacter ludwigii</i> (EF175735) [0.9979]        | 11.53 ( $\pm$ 2.07) | –                  | –      |
| 47 | KM_C30 | <i>Enterobacter ludwigii</i> (EF175735) [0.9979]        | 0.90 ( $\pm$ 0.01)  | –                  | –      |
| 48 | YL_H41 | <i>Enterobacter ludwigii</i> (KF358445) [0.9952]        | –                   | 0.36 ( $\pm$ 0.01) | –      |
| 49 | YL_F30 | <i>Enterobacter ludwigii</i> (KF475838) [0.9979]        | 20.43 ( $\pm$ 3.92) | –                  | –      |
| 50 | YL_F16 | <i>Enterobacter ludwigii</i> (KF475838) [0.9979]        | –                   | 0.06 ( $\pm$ 0.01) | 1.0188 |
| 51 | YJ_E25 | <i>Enterobacter</i> sp. (KY829260) [0.9966]             | 21.78 ( $\pm$ 3.87) | –                  | –      |
| 52 | KM_C05 | <i>Enterobacteriaceae bacterium</i> (LC007924) [0.9986] | 15.63 ( $\pm$ 2.57) | –                  | –      |
| 53 | KM_A83 | <i>Enterobacteriaceae bacterium</i> (LC007924) [0.9986] | –                   | 0.82 ( $\pm$ 0.01) | 1.0176 |
| 54 | YL_F29 | <i>Enterobacteriaceae bacterium</i> (LC007924) [0.9986] | –                   | 0.02 ( $\pm$ 0.01) | 1.0374 |
| 55 | YJ_C89 | <i>Enterobacteriaceae bacterium</i> (LC007924) [0.9986] | –                   | –                  | 1.0266 |
| 56 | YJ_G86 | <i>Exiguobacterium indicum</i> (JN644531) [0.9980]      | –                   | 0.32 ( $\pm$ 0.00) | –      |
| 57 | KM_C13 | <i>Hafnia alvei</i> (MH532496) [1]                      | 33.00 ( $\pm$ 5.69) | –                  | –      |
| 58 | KM_C21 | <i>Hafnia alvei</i> (MH532496) [1]                      | 29.70 ( $\pm$ 2.73) | 0.21 ( $\pm$ 0.01) | 1.0408 |
| 59 | KM_C18 | <i>Hafnia alvei</i> (MH532496) [1]                      | 17.97 ( $\pm$ 1.66) | –                  | –      |
| 60 | KM_C19 | <i>Hafnia alvei</i> (MH532496) [1]                      | 16.63 ( $\pm$ 1.93) | –                  | –      |
| 61 | KM_A88 | <i>Hafnia alvei</i> (MH532496) [1]                      | 15.92 ( $\pm$ 1.77) | –                  | –      |
| 62 | KM_A22 | <i>Hafnia alvei</i> (MH532496) [1]                      | 1.12 ( $\pm$ 0.09)  | –                  | –      |
| 63 | KM_A09 | <i>Hafnia alvei</i> (MH532496) [1]                      | 0.62 ( $\pm$ 0.01)  | –                  | –      |
| 64 | KM_C34 | <i>Hafnia alvei</i> (MH532496) [0.9986]                 | 0.58 ( $\pm$ 0.01)  | –                  | –      |
| 65 | KM_A15 | <i>Lelliottia amnigena</i> (KC951921) [0.9993]          | –                   | 0.59 ( $\pm$ 0.01) | –      |
| 66 | YJ_C96 | <i>Lelliottia aquatilis</i> (MG916969) [0.9979]         | –                   | 0.57 ( $\pm$ 0.01) | 1.0141 |
| 67 | YJ_G95 | <i>Lelliottia aquatilis</i> (MG916969) [0.9979]         | –                   | 0.18 ( $\pm$ 0.00) | –      |
| 68 | YJ_G87 | <i>Lelliottia aquatilis</i> (MG916969) [0.9980]         | –                   | 0.06 ( $\pm$ 0.01) | –      |
| 69 | YJ_G97 | <i>Lelliottia aquatilis</i> (MG916969) [0.9979]         | –                   | 0.06 ( $\pm$ 0.01) | –      |
| 70 | YL_F25 | <i>Lysobacter soli</i> (NR 116074) [0.9970]             | –                   | 0.22 ( $\pm$ 0.01) | 1.0509 |
| 71 | YL_F40 | <i>Mesorhizobium amorphae</i> (MK301166) [0.9956]       | 14.85 ( $\pm$ 2.02) | –                  | –      |
| 72 | YJ_E35 | <i>Methylibium</i> sp. (FJ615290) [0.9890]              | –                   | –                  | 1.0632 |

|     |        |                                                      |               |              |        |
|-----|--------|------------------------------------------------------|---------------|--------------|--------|
| 73  | YL_F42 | <i>Methylibium</i> sp. (FJ615290) [0.9890]           | –             | –            | 1.0276 |
| 74  | KM_A74 | <i>Microbacterium pumilum</i> (JQ291594) [0.9903]    | 15.40 (±3.13) | –            | –      |
| 75  | KM_A65 | <i>Microbacterium pumilum</i> (JQ291594) [0.9903]    | 10.65 (±1.56) | –            | –      |
| 76  | KM_C22 | <i>Pantoea agglomerans</i> (EU304255) [0.9966]       | 28.90 (±2.45) | 0.45 (±0.01) | –      |
| 77  | KM_A34 | <i>Pantoea agglomerans</i> (EU304255) [0.9966]       | 9.83 (±1.65)  | 0.47 (±0.01) | 1.1028 |
| 78  | KM_A94 | <i>Pantoea agglomerans</i> (EU304255) [0.9966]       | –             | 0.33 (±0.01) | –      |
| 79  | KM_G46 | <i>Pantoea agglomerans</i> (EU304255) [0.9966]       | –             | 0.19 (±0.01) | –      |
| 80  | YL_F02 | <i>Pantoea cyripedii</i> (NR 118857) [0.9883]        | 12.05 (±2.12) | 7.93 (±0.02) | 1.0523 |
| 81  | KM_A46 | <i>Providencia alcalifaciens</i> (AB480755) [0.9959] | 13.65 (±1.42) | –            | –      |
| 82  | KM_A56 | <i>Providencia alcalifaciens</i> (AB480755) [0.9959] | 13.52 (±1.33) | –            | –      |
| 83  | KM_C20 | <i>Providencia alcalifaciens</i> (AB480755) (0.9959) | 13.00 (±1.21) | –            | –      |
| 84  | KM_C06 | <i>Providencia alcalifaciens</i> (AB480755) [0.9959] | 12.58 (±1.09) | –            | –      |
| 85  | KM_C12 | <i>Providencia alcalifaciens</i> (AB480755) [0.9959] | 12.12 (±1.07) | –            | –      |
| 86  | KM_C10 | <i>Providencia alcalifaciens</i> (AB480755) [0.9959] | 10.60 (±1.05) | –            | –      |
| 87  | KM_A21 | <i>Providencia alcalifaciens</i> (AB480755) [0.9959] | 1.85 (±0.02)  | –            | –      |
| 88  | KM_A16 | <i>Providencia alcalifaciens</i> (AB480755) [0.9959] | 1.80 (±0.02)  | –            | –      |
| 89  | KM_A14 | <i>Providencia alcalifaciens</i> (AB480755) [0.9959] | 1.65 (±0.01)  | –            | –      |
| 90  | KM_A08 | <i>Providencia alcalifaciens</i> (AB480755) [0.9959] | 1.62 (±0.01)  | –            | –      |
| 91  | KM_A18 | <i>Providencia alcalifaciens</i> (AB480755) [0.9959] | 1.53 (±0.01)  | –            | –      |
| 92  | KM_A19 | <i>Providencia alcalifaciens</i> (AB480755) [0.9959] | 1.53 (±0.01)  | –            | –      |
| 93  | KM_A04 | <i>Providencia alcalifaciens</i> (AB480755) [0.9959] | 1.37 (±0.01)  | –            | –      |
| 94  | KM_C26 | <i>Providencia alcalifaciens</i> (AB480755) [0.9959] | 1.33 (±0.01)  | –            | –      |
| 95  | KM_C31 | <i>Providencia alcalifaciens</i> (AB480755) [0.9959] | 1.25 (±0.01)  | –            | –      |
| 96  | KM_A02 | <i>Providencia alcalifaciens</i> (AB480755) [0.9959] | 1.23 (±0.01)  | –            | –      |
| 97  | KM_A38 | <i>Providencia alcalifaciens</i> (AB480755) [0.9959] | 1.20 (±0.01)  | –            | –      |
| 98  | KM_A28 | <i>Providencia alcalifaciens</i> (AB480755) [0.9959] | 1.15 (±0.01)  | –            | –      |
| 99  | KM_C33 | <i>Providencia alcalifaciens</i> (AB480755) [0.9959] | 1.03 (±0.01)  | –            | –      |
| 100 | KM_C27 | <i>Providencia alcalifaciens</i> (AB480755) [0.9959] | 0.97 (±0.01)  | –            | –      |
| 101 | KM_A20 | <i>Pseudomonas alcaligenes</i> (KT998857) [0.9952]   | 1.62 (±0.01)  | –            | –      |
| 102 | YL_F39 | <i>Pseudomonas denitrificans</i> (KT273282) [0.9980] | –             | –            | 1.0233 |
| 103 | KM_A24 | <i>Pseudomonas fluorescens</i> (GU358073) [0.9979]   | 0.78 (±0.01)  | –            | –      |
| 104 | YL_F20 | <i>Pseudomonas koreensis</i> (KJ767342) [0.9979]     | 17.20 (±3.03) | 0.43(±0.01)  | –      |
| 105 | KM_A47 | <i>Pseudomonas moraviensis</i> (HQ242747) [0.9972]   | 0.73 (±0.01)  | –            | –      |
| 106 | KM_G33 | <i>Pseudomonas moraviensis</i> (HQ242747) [0.9972]   | –             | 1.87 (±0.01) | –      |
| 107 | KM_A81 | <i>Pseudomonas moraviensis</i> (HQ242747) [0.9972]   | –             | 0.92 (±0.01) | –      |
| 108 | KM_A59 | <i>Pseudomonas moraviensis</i> (HQ242747) [0.9972]   | –             | 0.61 (±0.01) | –      |
| 109 | KM_E01 | <i>Pseudomonas moraviensis</i> (HQ242747) [0.9972]   | –             | 0.50 (±0.01) | –      |
| 110 | KM_A77 | <i>Pseudomonas moraviensis</i> (HQ242747) [0.9972]   | –             | 0.39 (±0.01) | –      |
| 111 | KM_G96 | <i>Pseudomonas moraviensis</i> (HQ242747) [0.9972]   | –             | 0.28 (±0.01) | –      |

|     |        |                                                           |               |              |                |
|-----|--------|-----------------------------------------------------------|---------------|--------------|----------------|
| 112 | YJ_G97 | <i>Pseudomonas moraviensis</i> (HQ242747) [0.9979]        | –             | 0.22 (±0.01) | –              |
| 113 | YL_F27 | <i>Pseudomonas moraviensis</i> (HQ242747) [0.9972]        | –             | 0.11 (±0.01) | –              |
| 114 | KM_G88 | <i>Pseudomonas moraviensis</i> (HQ242747) [0.9972]        | –             | 0.11 (±0.01) | –              |
| 115 | YL_F24 | <i>Pseudomonas moraviensis</i> (HQ242747) [0.9972]        | –             | 0.04 (±0.01) | –              |
| 116 | YJ_G89 | <i>Pseudomonas moraviensis</i> (KY357301) [0.9979]        | –             | 0.88 (±0.01) | –              |
| 117 | KM_A79 | <i>Pseudomonas mosselii</i> (LN995691) [0.9993]           | –             | 0.14 (±0.01) | –              |
| 118 | YL_F09 | <i>Pseudomonas mosselii</i> (LN995691) [0.9993]           | –             | –            | 1.0175         |
| 119 | YL_F13 | <i>Pseudomonas oryzihabitans</i> (MG571765) [0.9993]      | 17.10 (±3.45) | –            | 1.0197         |
| 120 | KM_A57 | <i>Pseudomonas putida</i> (AY918067) [0.9979]             | –             | 9.23 (±0.02) | 1.0345         |
| 121 | KM_G25 | <i>Pseudomonas putida</i> (AY918067) [0.9979]             | 14.07 (±2.77) | 8.36 (±0.02) | 1 (as control) |
| 122 | YJ_C98 | <i>Pseudomonas putida</i> (AY918067) [0.9979]             | –             | 2.16 (±0.01) | –              |
| 123 | YJ_G92 | <i>Pseudomonas putida</i> (AY918067) [0.9979]             | –             | 0.26 (±0.01) | –              |
| 124 | KM_G62 | <i>Pseudomonas putida</i> (AY918067) [0.9979]             | –             | 0.04 (±0.01) | –              |
| 125 | KM_A10 | <i>Pseudomonas putida</i> (HQ242744) [0.9959]             | 0.83 (±0.01)  | –            | –              |
| 126 | KM_G48 | <i>Pseudomonas putida</i> (HQ242744) [0.9972]             | –             | 3.20 (±0.01) | –              |
| 127 | YJ_C99 | <i>Pseudomonas putida</i> (MH379785) [1]                  | 6.40 (±1.31)  | –            | –              |
| 128 | KM_C16 | <i>Raoultella terrigena</i> (NR 113703) [0.9945]          | 20.82 (±4.22) | –            | –              |
| 129 | KM_C23 | <i>Raoultella terrigena</i> (NR 113703) [0.9945]          | 12.07 (±1.67) | –            | –              |
| 130 | KM_A49 | <i>Serratia fonticola</i> (MK235155) [0.9979]             | 20.30 (±4.55) | –            | –              |
| 131 | KM_C15 | <i>Serratia fonticola</i> (MK235155) [0.9979]             | 14.30 (±2.68) | –            | –              |
| 132 | KM_C29 | <i>Serratia fonticola</i> (MK235155) [0.9979]             | 0.77 (±0.01)  | –            | –              |
| 134 | KM_C39 | <i>Staphylococcus epidermidis</i> (MK883070) [1]          | 1.45 (±0.01)  | –            | –              |
| 135 | YL_F10 | <i>Stenotrophomonas maltophilia</i> (KX817273) [0.9979]   | –             | 1.00 (±0.01) | 1.0221         |
| 136 | YJ_G91 | <i>Stenotrophomonas rhizophila</i> (KC178602) [0.9993]    | –             | 0.03 (±0.01) | –              |
| 137 | YL_F14 | <i>Stenotrophomonas rhizophila</i> (KC178602) [0.9993]    | –             | –            | 1.0304         |
| 138 | YL_F50 | <i>Streptomyces erythrochromogenes</i> (AB184746) [0.999] | –             | –            | 1.0420         |
| 139 | YL_F45 | <i>Streptomyces exfoliatus</i> (MK801227) [0.9979]        | –             | –            | 1.0423         |
| 140 | YL_E17 | <i>Streptomyces narbonensis</i> (NR 112282) [0.9970]      | –             | –            | 1.0231         |
| 141 | YL_F48 | <i>Streptomyces narbonensis</i> (NR 112282) [0.9970]      | –             | –            | 1.0234         |
| 142 | YJ_E34 | <i>Streptomyces narbonensis</i> (NR 112282) [0.9970]      | –             | –            | 1.0311         |
| 143 | YL_F34 | <i>Variovorax paradoxus</i> (KX905301) [0.9993]           | –             | 0.35 (±0.01) | 1.0821         |
| 144 | KM_A95 | <i>Xanthomonas campestris</i> (KU997693) [0.9993]         | –             | 0.45 (±0.01) | –              |
